# Supplementary material
Source: PubMed Central journal article supplement (PMC506817)

## High salt solution structure of a left-handed RNA double helix

Mariusz Popena, Jan Milecki and Ryszard W. Adamiak\*

### SUPPLEMENTARY MATERIAL

Table S1. <sup>1</sup>H NMR chemical shifts  $\delta_H$  (p.p.m.) of (CGCGCG)<sub>2</sub> in the Z-RNA form at 303 K in D<sub>2</sub>O.

| Residue | H8/H6 | H5   | H1'  | H2'  | H3'  | H4'  | H5'  | H5'' | imino | amino |      |
|---------|-------|------|------|------|------|------|------|------|-------|-------|------|
| C1      | 7.33  | 5.88 | 5.83 | 3.88 | 4.45 | 3.76 | 3.01 | 2.57 | -     | 8.28  | 6.29 |
| G2      | 7.84  | -    | 5.95 | 4.45 | 5.26 | 4.35 | 4.24 | 4.24 | 13.14 | -     | -    |
| C3      | 7.25  | 5.27 | 5.85 | 4.00 | 4.61 | 3.93 | 3.88 | 2.51 | -     | 8.54  | 5.84 |
| G4      | 7.91  | -    | 5.96 | 4.49 | 5.20 | 4.35 | 4.29 | 4.20 | 13.01 | -     | -    |
| C5      | 7.34  | 5.37 | 5.92 | 4.06 | 4.65 | 3.99 | 3.89 | 2.65 | -     | 8.51  | 5.86 |
| G6      | 7.86  | -    | 5.90 | 5.11 | 4.79 | 4.32 | 4.24 | 4.22 | 13.04 | -     | -    |

Table S2. Experimental  $J_{1',2'}$ ,  $J_{2',3'}$  and  $J_{3',4'}$  coupling constants, sugar pucker parameters<sup>a)</sup> and percentage of N conformers for (CGCGCG)<sub>2</sub> in the Z-RNA form.

| Residue | coupling constants [Hz] <sup>b)</sup> |             |             | PSEUROT <sup>c)</sup> |          |          |          |        | 12 final structures <sup>d)</sup> |        |
|---------|---------------------------------------|-------------|-------------|-----------------------|----------|----------|----------|--------|-----------------------------------|--------|
|         | $J_{1',2'}$                           | $J_{2',3'}$ | $J_{3',4'}$ | $P_N$                 | $\Phi_N$ | $P_S$    | $\Phi_S$ | $\%_N$ | $P$                               | $\Phi$ |
| C1      | 8.0                                   | 4.7         | ≤1.0        | 17 (16)               | 31 (6)   | 177 (17) | 39 (6)   | 2      | 198 (1)                           | 35 (1) |
| G2      | ≤1.0                                  | 5.5         | 9.8         | 35 (2)                | 40 (2)   | -        | -        | 100    | 48 (2)                            | 41 (1) |
| C3      | 7.8                                   | 4.4         | 0.9         | -28 (14)              | 36 (4)   | 185 (17) | 41 (6)   | 2      | 135 (3)                           | 40 (2) |
| G4      | ≤1.0                                  | 5.9         | 9.2         | 32 (1)                | 35 (1)   | -        | -        | 100    | 44 (2)                            | 36 (2) |
| C5      | 7.8                                   | 3.9         | 1.4         | -21 (15)              | 29 (7)   | 184 (22) | 48 (8)   | 6      | 162 (3)                           | 41 (1) |
| G6      | 3.8                                   | 6.2         | 5.2         | 48 (16)               | 27 (9)   | 190 (59) | 25 (8)   | 68     | 24 (4)                            | 36 (1) |

<sup>a)</sup> average values are given with standard deviations in parentheses.

<sup>b)</sup> ± 1Hz

<sup>c)</sup> all five values  $P_N$ ,  $P_S$ ,  $\Phi_N$ ,  $\Phi_S$ ,  $\%_N$  were fitted to experimental data. Initial values of  $\Phi_N$ ,  $\Phi_S$  were of 30° and initial  $\%_N$  was 50%. Initial values of  $P_N$  and  $P_S$  changed independently from 0° to 360° every 10°. For statistics, only results giving r.m.s.d. values less than 0.5 [Hz] were employed.

<sup>d)</sup> ref (37)

Table S3. Backbone and glycosidic torsion angles<sup>a)</sup> for 12 conformers representing the refined structure of (CGCGCG)<sub>2</sub> in the Z-RNA form (*left column*) and 11 reference X-ray Z-DNA structures<sup>b)</sup> of d(CGCGCG)<sub>2</sub> (*right column*).

| Res. | $\alpha$ |                      | $\beta$ |                       | $\gamma$ |        | $\delta$ |        | $\epsilon$ |                      | $\zeta$ |                      | $\chi$  |         |
|------|----------|----------------------|---------|-----------------------|----------|--------|----------|--------|------------|----------------------|---------|----------------------|---------|---------|
| C1   | -        | -                    | -       | -                     | 46(2)    | 39(38) | 153(1)   | 143(6) | -68(1)     | -93(4)               | 76(2)   | 75(5)                | -151(2) | -150(5) |
| G2   | 49(4)    | 65(5)                | -163(2) | -172(3)               | -175(3)  | 177(3) | 81(1)    | 95(7)  | -104(1)    | -117(7) <sup>c</sup> | -55(2)  | -64(17) <sup>c</sup> | 60(2)   | 62(5)   |
| C3   | -145(2)  | -150(9) <sup>c</sup> | 175(4)  | -132(15) <sup>c</sup> | 71(1)    | 54(4)  | 127(2)   | 147(4) | -72(1)     | -95(5)               | 76(2)   | 75(4)                | -159(2) | -156(4) |
| G4   | 69(3)    | 66(5)                | -159(1) | -174(6)               | 172(1)   | 179(3) | 86(2)    | 95(5)  | -105(1)    | -123(9) <sup>c</sup> | -65(3)  | -55(16) <sup>c</sup> | 61(1)   | 60(6)   |
| C5   | -134(4)  | -155(8) <sup>c</sup> | -158(3) | -133(12) <sup>c</sup> | 54(4)    | 49(7)  | 146(1)   | 141(5) | -83(4)     | -95(4)               | 71(1)   | 70(7)                | -141(2) | -155(6) |
| G6   | 62(2)    | 79(7)                | -165(1) | -179(5)               | -173(1)  | 176(3) | 84(1)    | 148(5) | -          | -                    | -       | -                    | 47(2)   | 76(3)   |

<sup>a)</sup>  $P \propto O5' \beta C5' \gamma C4' \delta C3' \epsilon O3' \zeta P$ ; average values with standard deviations in parentheses are given

<sup>b)</sup> PDB ID: 131D, 1D39, 1D48, 1DCG, 1DJ6, 1I0T, 1ICK, 292D, 293D, 2DCG, 336D.

<sup>c)</sup> GpC step typical of the Z<sub>I</sub>-DNA form

<sup>d)</sup> GpC step typical of the Z<sub>II</sub>-DNA form

Table S4. Lower (*left column*) and upper (*right column*) limits [ $^{\circ}$ ] for the initial torsion angle restraints used in the structure determination (CYANA) of (CGCGCG)<sub>2</sub> in the Z-RNA form

| Residue  | $\beta$ |     | $\gamma$ |    | $\chi$ |      | $\nu_1$ |    | $\nu_2$ |     | $\delta$ |     | $\epsilon$ |     |
|----------|---------|-----|----------|----|--------|------|---------|----|---------|-----|----------|-----|------------|-----|
| C1 (C7)  | 132     | 228 | 40       | 70 | -200   | -120 | 17      | 50 | -50     | -23 | 127      | 168 | 188        | 292 |
| G2 (G8)  | 165     | 195 | na       | na | 26     | 106  | -18     | -8 | 27      | 39  | 75       | 85  | 188        | 292 |
| C3 (C9)  | 132     | 228 | 40       | 70 | -200   | -120 | 17      | 50 | -50     | -23 | 127      | 168 | 188        | 292 |
| G4 (G10) | 165     | 195 | na       | na | 26     | 106  | -16     | -7 | 23      | 35  | 80       | 90  | 188        | 292 |
| C5 (C11) | 132     | 228 | 40       | 70 | -200   | -120 | 16      | 50 | -50     | -26 | 127      | 170 | 188        | 292 |
| G6 (G12) | 165     | 195 | na       | na | 26     | 106  | -18     | 44 | -29     | 39  | 75       | 123 | -          | -   |

Fig. S1.  $^1\text{H}$  NMR spectra of (CGCGCG)<sub>2</sub> at 0M (right-handed form) (*bottom*) and 6M NaClO<sub>4</sub> (left-handed form) (*top*).

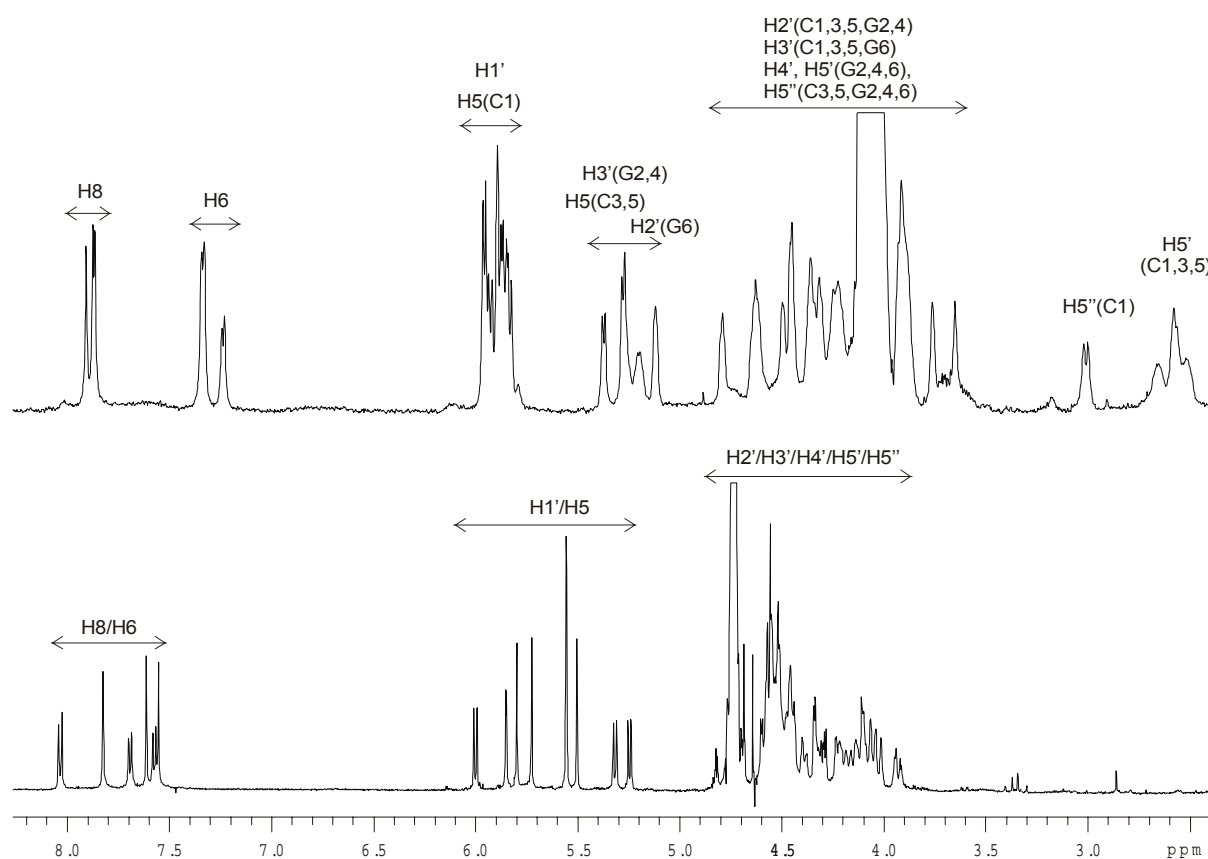

Fig. S2. Applied protocol for the structure determination (CYANA) of the (CGCGCG)<sub>2</sub> in Z-RNA form. At the structure calculation stage, the TAD algorithm was implemented to a new subroutine *ndrs.cya* which allows for automatic NOE distance restraints selection.

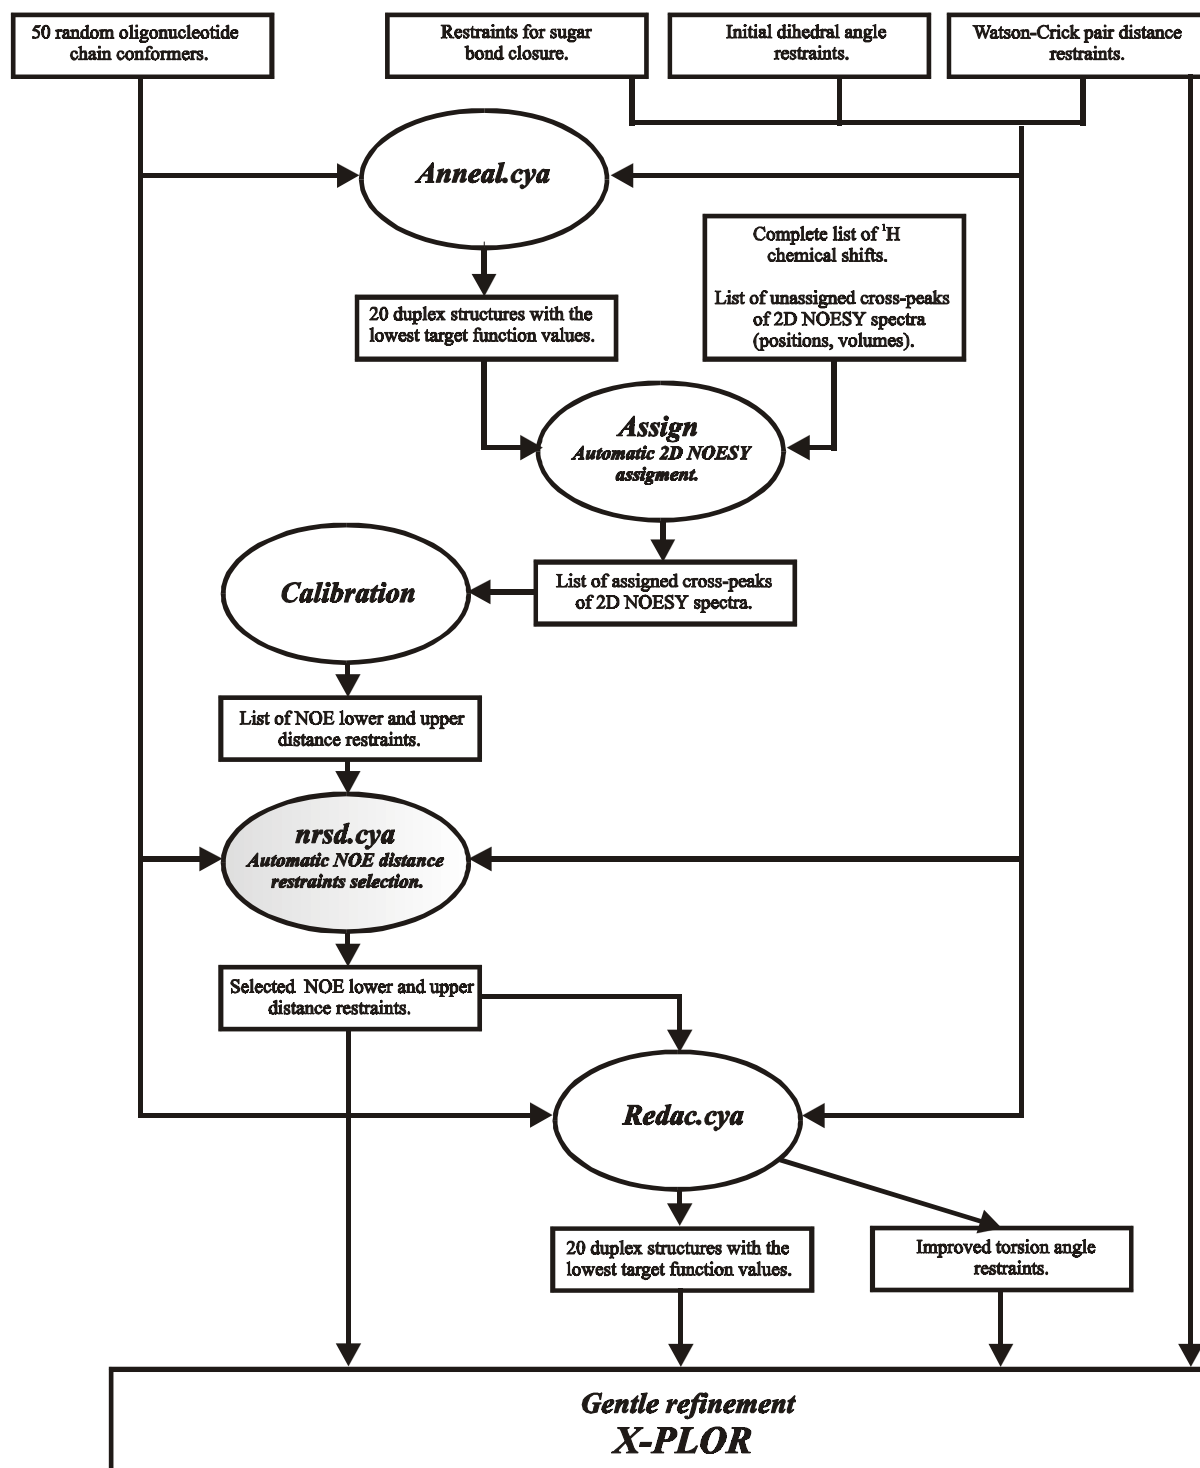

Supplement: nar_32_13_4044__1.pdf [file nar_32_13_4044__1.pdf]
